# Supplementary material
Source: Springer Nature journal article supplement (https://www.springermedizin.de/resource/supplementary/13737_2012_16_MOESM5_ESM.pdf/9682082)
Supplement: MOESM5 [file 9682082]

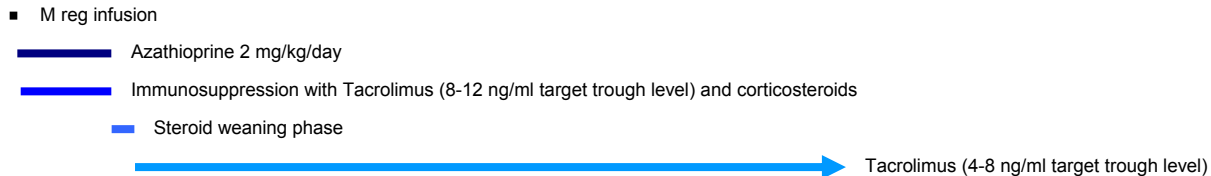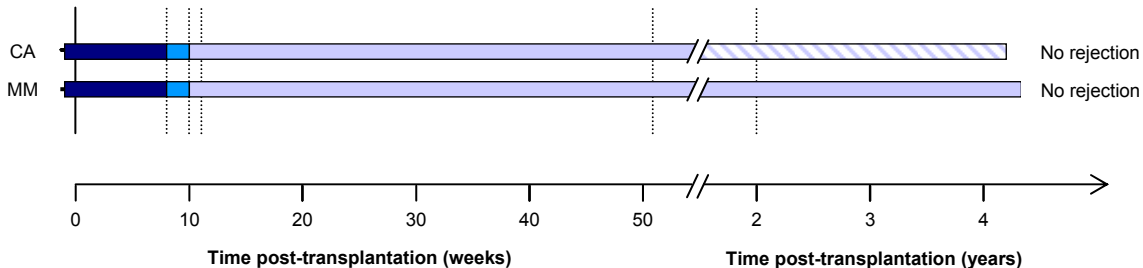

- Complete withdrawal of all immunosuppressive therapy
- Tacrolimus monotherapy, trough serum levels: <4 ng/ml
- Tacrolimus monotherapy, trough serum levels:  $\geq 4 - 8$  ng/ml
- Tacrolimus monotherapy, trough serum levels: >8 ng/ml
